# Supplementary material
Source: publisher figshare collection journal article supplement (https://tandf.figshare.com/ndownloader/files/21695955)
Supplement: Supplementary file 1 [file 21695955]

**Insight into the Screening of Potential Beta-Lactamase Inhibitors as Anti-Bacterial Chemical Agents through Pharmacoinformatics Study**

Pratap Parida, Shovonlal Bhowmick, Achintya Saha, Md Ataul Islam

***Supplementary data***

**Plant species**

*Phyllanthus urinaria* belongs to the family Phyllanthaceae and is commonly known as Chamber bitter. It is a small annual herb and grows up to 2 ft height. This plant is used as an effective treatment for elimination of kidney and gall bladder stones, urinary tract infection, and bladder inflammation (23). The different phyto-chemicals present in this plant are retrieved (24).

*Solanum surattense* is commonly known as thorny nightshade. It belongs to the family Solanaceae. This plant is an important potent medicinal plant which are generally used in traditional Indian medicinal system. It is used as multipurpose agent such as antibacterial, antinociceptive, anti-plasmodial and larvicidal (25-28).

*Tephrosia purpurea* commonly known as common tephrosia is from the family Fabaceae (Pea family). It is used in the traditional medicine system for the treatment of different diseases and used in different system of traditional medication for the treatment of diseases and illnesses of human beings. It is reported to contain various flavonoides, alkaloids, steroids, phenolic compounds. The bioactive compounds of this plant are having anticancer, antioxidant, anti-inflammatory, antiulcer, hepatoprotective, immunomodulatory, antilithiatic, antibiotic, antimicrobial, anyihyperglycemic, antilipidperoxidative and wound healing activities (29-31).

*Thevetia nerifolia* commonly known as yellow oleander**.** It belongs to the family Apocynaceae (oleander family). The synonyms of this pant are *Thevetia neriifolia*, *Thevetia peruviana.* This plant has trivial contribution towards the traditional medicinal system of tropical Asia, Central and South America. Different classes of bioactive compounds (alkaloids, flavonoids, steroids, cardiac glycosides, terpenoids, tannins, saponins etc) are present in this plant. The different parts of the plants are reported to have antimicrobial activity (32).

**Table S1**: Name and SMILES representation of phytochemicals. The Plants are denoted as AL: **Acacia leucophloea**,PU: **Phyllanthus urinaria**, SS**: Solanum surattense**, TP**: Tephrosia purpurea**, TN**: Thevetia nerifolia**

| **Sl. No** | **Compound Name** | **SMILES** | **Plant Name** |
| --- | --- | --- | --- |
| 1 | (-)-syringaresinol | COC1=CC(=CC(=C1O)OC)C2C3COC(C3CO2)C4=CC(=C(C(=C4)OC)O)OC | PU |
| 2 | (+)- Pinitol |  | AL |
| 3 | (+)-Dihydrocubebin | C1OC2=C(O1)C=C(C=C2)CC(CO)C(CC3=CC4=C(C=C3)OCO4)CO | PU |
| 4 | (+)-Lyoniresinol | COC1=CC(=CC(=C1O)OC)C2C(C(CC3=CC(=C(C(=C23)OC)O)OC)CO)CO | PU |
| 5 | (+)-tephropurpurin | CC(=O)OC1C2C(OC3=CC(=C(C(=C23)O)C(=O)C=CC4=CC=CC=C4)OC)OC1(C)C | TP |
| 6 | (+)-tephrorin A | CC(=O)OC1C(C(OC1(C)C)O)C2=C(C=CC3=C2OC(CC3=O)C4=CC=CC=C4)OC | TP |
| 7 | (+)-Tephrorin B | CC1(C(C(CO1)C2=C(C=CC3=C2OC(CC3=O)C4=CC=CC=C4)O)OC(=O)C=CC5=CC=CC=C5)C | TP |
| 8 | (+)-tephrosone | CC1(C(C2C(O1)OC3=C2C(=C(C=C3)C(=O)C=CC4=CC=CC=C4)O)O)C | TP |
| 9 | (E)-Beta-Caryophyllene | CC1=CCCC(=C)C2CC(C2CC1)(C)C | TP |
| 10 | (E)-Nerolidol | CC(=CCCC(=CCCC(C)(C=C)O)C)C | TP |
| 11 | 1- Hydroxy-8 -methoxy-2-methylanthraquinone-3-o- α-L-rhamnopyranoside | C1(=O)c2c(C(=O)c3c1c(c(c(c3)OC1C(C(C(C(O1)C)O)O)O)C)O)cccc2OC | AL |
| 12 | 1,3- Dihydroxy-5-methoxy-2-methylanthraquinone-3-o- α-L-rhamnopyranoside | C1(=O)c2c(C(=O)c3c1c(cc(c3)OC1C(C(C(C(O1)C)O)O)O)OC)c(c(c(c2)O)C)O | AL |
| 13 | 1,5- Hihydroxy-8-methoxy-2-methylanthraquinone-3-o- α-L-rhamnopyranoside | C1(=O)c2c(C(=O)c3c1c(c(c(c3)OC1C(C(C(C(O1)C)O)O)O)C)O)c(ccc2OC)O | AL |
| 14 | 16-Heptadecenal | C=CCCCCCCCCCCCCCCC=O | PU |
| 15 | 17β-diol | CC12CCC(CC1CCC3C2CCC4(C3CCC4O)C)O | PU |
| 16 | 1-Caffeoylquinic acid | C1C(C(C(CC1(C(=O)O)OC(=O)C=CC2=CC(=C(C=C2)O)O)O)O)O | PU |
| 17 | 1-Nonene | CCCCCCCC=C | TN |
| 18 | 2-Butoxyethyl acetate | CCCCOCCOC(=O)C | TN |
| 19 | 2-Nonenal | CCCCCCC=CC=O | TN |
| 20 | 2-Propyl-1-heptanol | CCCCCC(CCC)CO | TN |
| 21 | 3,5-dihydroxy-4-methoxybenzoic acid | CCOC(=O)C1=CC(=C(C(=C1)O)OC)O | PU |
| 22 | 3'-Hydroxy-7-methoxy isoflavone | C1=C(C=CC2C1OC=C(C2=O)c1cc(ccc1)O)OC | AL |
| 23 | 4-Isopropyl-1,3-cyclohexanedione | CC(C)C1CCC(=O)CC1=O | TN |
| 24 | 5-demethoxyniranthin | COCC(CC1=CC2=C(C=C1)OCO2)C(CC3=CC(=C(C=C3)OC)OC)COC | PU |
| 25 | 5-hydroxymethyl-2-furaldehyde | C1=C(OC(=C1)C=O)CO | PU |
| 26 | 5-methoxy isolonchocarpinl | c12c(ccc3c1C=C[C@H](O3)C)C(=O)C[C@H](O2)c1cc(ccc1)C | TP |
| 27 | 6'-demethoxypraecansone B | CC1(C=CC2=C(O1)C=CC(=C2OC)C(=O)C=C(C3=CC=CC=C3)O)C | TP |
| 28 | 6R)-menthiafolic acid | CC(=CCCC(C)(C=C)O)C(=O)O | PU |
| 29 | 8-c-Glucoside of Apegenin | c1(c(cc(c2c1oc(cc2=O)c1ccc(cc1)O)O)O)C1(O)OC(C(C(C1O)O)O)CO | AL |
| 30 | 8-Methyl-1-undecene | CCCC(C)CCCCCC=C | TN |
| 31 | 9-Octadecenal | CCCCCCCCC=CCCCCCCCC=O | TN |
| 32 | 9-Octadecenamide | CCCCCCCCC=CCCCCCCCC(=O)N | TN |
| 33 | 9-Octadecenol | CCCCCCCCC=CCCCCCCCCO | TN |
| 34 | 9α-diol | CC1(CC(C23C1CCC(C2)(C(CC3)O)C)O)C | PU |
| 35 | Alpha-Humulene | CC1=CCC(C=CCC(=CCC1)C)(C)C | TP |
| 36 | Apegenin | C1=CC(=CC=C1C2=CC(=O)C3=C(C=C(C=C3O2)O)O)O | AL |
| 37 | Astragalin | C1=CC(=CC=C1C2=C(C(=O)C3=C(C=C(C=C3O2)O)O)OC4C(C(C(C(O4)CO)O)O)O)O | PU |
| 38 | Azulene | C1=CC=C2C=CC=C2C=C1 | TP |
| 39 | Behenic ester | CCCCCCCCCCCCCCCCCCCCCC(=O)OCCCCCCCCCCCCCCCCO | AL |
| 40 | Benzoic acid | C1=CC=C(C=C1)C(=O)O | TN |
| 41 | β-Sitosterol | CCC(CCC(C)C1CCC2C1(CCC3C2CC=C4C3(CCC(C4)O)C)C)C(C)C | AL, PU, SS, TP, TN |
| 42 | Betulin | CC(=C)C1CCC2(C1C3CCC4C5(CCC(C(C5CCC4(C3(CC2)C)C)(C)C)O)C)CO | PU |
| 43 | Betulinic acid 3-o-β-D-maltoside | C1(C(C(C(C(O1)OC1C(OC(C(C1O)O)OC1CCC2(C(C1(C)C)CCC1(C2CCC2C1C(CC1(C2C(CC1)C(=C)C)C(=O)O)C)C)C)CO)O)O)O)CO | AL |
| 44 | Brevifolincarboxylic Acid | C1C(C2=C(C1=O)OC(=O)C3=CC(=C(C(=C32)O)O)O)C(=O)O | PU |
| 45 | Bulnesol | CC1CCC2=C(CCC(CC12)C(C)(C)O)C | TP |
| 46 | Butelinic acid | [C@]12([C@H](C([C@H](CC1)O)(C)C)CC[C@@]1([C@@H]2CC[C@H]2[C@]1(CC[C@@]1([C@@H]2[C@@H](CC1)C(=C)C)C(=O)O)C)C)C | TP |
| 47 | Carissanol Dimethyl Ether | COC1=C(C=C(C=C1)CC2COC(C2(CC3=CC(=C(C=C3)OC)OC)O)O)OC | PU |
| 48 | Carvacrol | CC1=C(C=C(C=C1)C(C)C)O | TN |
| 49 | Caryophyllene oxide | CC1(CC2C1CCC3(C(O3)CCC2=C)C)C | TP |
| 50 | Cerberin | CC1C(C(C(C(O1)OC2CCC3(C(C2)CCC4C3CCC5(C4(CCC5C6=CC(=O)OC6)O)C)C)OC(=O)C)OC)O | TN |
| 51 | Chebulagic Acid | C1C2C3C(C(C(O2)OC(=O)C4=CC(=C(C(=C4)O)O)O)OC(=O)C5=CC(=C(C6=C5C(C(C(=O)O3)CC(=O)O)C(C(=O)O6)O)O)O)OC(=O)C7=CC(=C(C(=C7C8=C(C(=C(C=C8C(=O)O1)O)O)O)O)O)O | PU |
| 52 | Cheiranthoside III | CC1C(C(C(C(O1)OC2C(OC(CC2O)OC3CCC4(C5CCC6(C(CCC6(C5CCC4(C3)O)O)C7=CC(=O)OC7)C)C=O)C)O)O)O | TN |
| 53 | Cisplatin-d(apg)adduct | o1c2c(c(O)c(c3OC(CCc23)(C)C)CC=C(C)C)c(=O)c(c1)c1cc(O)c(O)cc | PU |
| 54 | Cis-Pulegone oxide | CC1CCC2(C(=O)C1)C(O2)(C)C | TN |
| 55 | Cleistanthol | CC1=C(C=C2C(=C1C=C)CCC3C2(CC(C(C3(C)C)O)O)C)O | PU |
| 56 | Corilagin | C1C2C(C(C(C(O2)OC(=O)C3=CC(=C(C(=C3)O)O)O)O)OC(=O)C4=CC(=C(C(=C4C5=C(C(=C(C=C5C(=O)O1)O)O)O)O)O)O)O | PU |
| 57 | Cyanin | C1=CC(=C(C=C1C2=C(C=C3C(=CC(=CC3=[O+]2)O)OC4C(C(C(C(O4)CO)O)O)O)OC5C(C(C(C(O5)CO)O)O)O)O)O | AL |
| 58 | Cyclohexane | C1CCCCC1 | PU |
| 59 | Daucosterol | CCC(CCC(C)C1CCC2C1(CCC3C2CC=C4C3(CCC(C4)OC5C(C(C(C(O5)CO)O)O)O)C)C)C(C)C | PU |
| 60 | Dehydrochebulic acid trimethyl ester | COC(=O)C=C(C1C(OC(=O)C2=CC(=C(C(=C12)O)O)O)C(=O)OC)C(=O)OC | PU |
| 61 | Delphinidin | C1=C(C=C(C(=C1O)O)O)C2=[O+]C3=CC(=CC(=C3C=C2O)O)O.[Cl-] | AL |
| 62 | Dextrobursehernin | c12c(ccc3c1C=C[C@H](O3)C)C(=O)C[C@H](O2)c1cc(ccc1)C | PU |
| 63 | Digitoxigenin | CC12CCC(CC1CCC3C2CCC4(C3(CCC4C5=CC(=O)OC5)O)C)O | TN |
| 64 | Diguelin | c12cc(c(cc1OC[C@@H]1[C@H]2C(=O)c2c(O1)c1c(cc2)OC(C=C1)(C)C)OC)OC | TP |
| 65 | Diosgenine | CC1CCC2(C(C3C(O2)CC4C3(CCC5C4CC=C6C5(CCC(C6)OC(=O)C7=CC=CC=C7)C)C)C)OC1 | SS |
| 66 | Doxorubicin | CC1C(C(CC(O1)OC2CC(CC3=C2C(=C4C(=C3O)C(=O)C5=C(C4=O)C(=CC=C5)OC)O)(C(=O)CO)O)N)O | PU |
| 67 | Ellagic Acid | C1=C2C3=C(C(=C1O)O)OC(=O)C4=CC(=C(C(=C43)OC2=O)O)O | PU |
| 68 | Epicatechin | C1C(C(OC2=CC(=CC(=C21)O)O)C3=CC(=C(C=C3)O)O)O | PU |
| 69 | Epicatechin 3-O-gallate | C1C(C(OC2=CC(=CC(=C21)O)O)C3=CC(=C(C=C3)O)O)OC(=O)C4=CC(=C(C(=C4)O)O)O | PU |
| 70 | Epigallocatechin | C1C(C(OC2=CC(=CC(=C21)O)O)C3=CC(=C(C(=C3)O)O)O)O | PU |
| 71 | Epigallocatechin Gallate | C1C(C(OC2=CC(=CC(=C21)O)O)C3=CC(=C(C(=C3)O)O)O)OC(=O)C4=CC(=C(C(=C4)O)O)O | PU |
| 72 | Epiglobulol | CC1CCC2C1C3C(C3(C)C)CCC2(C)O | TP |
| 73 | Ethyl brevifolincarboxylate | CCOC(=O)C1CC(=O)C2=C1C3=C(C(=C(C=C3C(=O)O2)O)O)O | PU |
| 74 | Evofolin B | COC1=C(C=CC(=C1)C(CO)C(=O)C2=CC(=C(C=C2)O)OC)O | PU |
| 75 | Excoecarianin | C1C2C3C(C(C(O2)OC(=O)C4=CC(=C(C(=C4)O)O)O)OC(=O)C5=CC(=C(C6=C5C7C(=CC(=O)C(C7(O)O)(O6)O)C(=O)O3)O)O)OC(=O)C8=C(C(=C(C(=C8)C9=C(C(=C(C=C9C(=O)O1)OC1=C(C(=C(C=C1C(=O)OC1C2C(C(COC(=O)C3=CC(=C(C(=C3C3=C(C(=C(C=C3C(=O)O2)O)O)O)O)O)O)OC1OC(=O)C1=CC(=C(C(=C1)O)O)O)OC(=O)C1=CC(=C(C(=C1)O)O)O)O)O)O)O)O)O)O)O | PU |
| 76 | Ferulic acid | COC1=C(C=CC(=C1)C=CC(=O)O)O | PU |
| 77 | Furosin | C1=C(C=C(C(=C1O)O)O)C(=O)OC2C3C(C(C(O2)CO)OC(=O)C4=CC(=O)C(C5(C4C6=C(O5)C(=C(C=C6C(=O)O3)O)O)O)(O)O)O | PU |
| 78 | Galangin-3-o- α-L-rhamnopyranoside | c1c(cc(c2c1oc(c(c2=O)OC1C(C(C(C(O1)C)O)O)O)c1ccccc1)O)O | AL |
| 79 | Gallic acid | C1=C(C=C(C(=C1O)O)O)C(=O)O | AL |
| 80 | Gallic Acid | C1=C(C=C(C(=C1O)O)O)C(=O)O | PU |
| 81 | Gallocatechin-3-gallate | C1C(C(OC2=CC(=CC(=C21)O)O)C3=CC(=C(C(=C3)O)O)O)OC(=O)C4=CC(=C(C(=C4)O)O)O | PU |
| 82 | Geraniin | C1C2C3C(C(C(O2)OC(=O)C4=CC(=C(C(=C4)O)O)O)OC(=O)C5=CC(=C(C6=C5C7C(=CC(=O)C(C7(O)O)(O6)O)C(=O)O3)O)O)OC(=O)C8=CC(=C(C(=C8C9=C(C(=C(C=C9C(=O)O1)O)O)O)O)O)O | PU |
| 83 | Hexacosanoic acid | CCCCCCCCCCCCCCCCCCCCCCCCCC(=O)O | PU |
| 84 | Hexacosanol | CCCCCCCCCCCCCCCCCCCCCCCCCCO | AL |
| 85 | Hexadecanoic acid | CCCCCCCCCCCCCCCC(=O)O | TP |
| 86 | Humulene epoxide II | CC1=CCC(C=CCC2(C(O2)CC1)C)(C)C | TP |
| 87 | Hypophyllanthin | COC[C@@H]1CC2=CC(=C3C(=C2[C@@H]([C@H]1COC)C4=CC(=C(C=C4)OC)OC)OCO3)OC | PU |
| 88 | Isoglabratephrin | CC(=O)OC1C(OC(=O)C12COC3=C2C4=C(C=C3)C(=O)C=C(O4)C5=CC=CC=C5)(C)C | TP |
| 89 | Isolonchocarpin | CC1(C=CC2=C(O1)C=CC3=C2OC(CC3=O)C4=CC=CC=C4)C | TP |
| 90 | Isolongifolan-8-ol | CC1(CCC(C2C13CCC(C3)C2(C)C)O)C | TP |
| 91 | Isookanin | C1C(OC2=C(C1=O)C=CC(=C2O)O)C3=CC(=C(C=C3)O)O | AL |
| 92 | Isopulegol | CC1CCC(C(C1)O)C(=C)C | TN |
| 93 | Isoquercitrin | C1=CC(=C(C=C1C2=C(C(=O)C3=C(C=C(C=C3O2)O)O)OC4C(C(C(C(O4)CO)O)O)O)O)O | PU |
| 94 | Kaemferol | C1=CC(=CC=C1C2=C(C(=O)C3=C(C=C(C=C3O2)O)O)O)O | AL, PU, TN |
| 95 | Kaempferol 7-methyl ether | COC1=CC(=C2C(=C1)OC(=C(C2=O)OC3C(C(CO3)(COC4C(C(CO4)(CO)O)O)O)O)C5=CC=C(C=C5)OC6C(C(C(C(O6)CO)O)O)O)O | PU |
| 96 | Karanjin | c12c(ccc3c1cco3)CC(=C(O2)c1ccccc1)OC | TP |
| 97 | Karanjonol | c12c(ccc3c1cco3)CC(=C(O2)c1ccccc1)O | TP |
| 98 | Leucodelphinidin-3-o- α-L-rhamnopyranoside | CC1C(C(C(C(O1)OC2C(C3=C(C=C(C=C3OC2C4=CC(=C(C(=C4)O)O)O)O)O)O)O)O)O | AL |
| 99 | Leucophleol | CC1(CCC(C2(C1CCC3=CC(CCC32)(C)C(CO)O)C)O)C | AL |
| 100 | Leucophleoxol | CC1(CCC(C2(C1CCC3=CC(CC(C32)O)(C)C4CO4)C)O)C | AL |
| 101 | Leucoxol | CC1(CCC(C2(C1CCC3=CC4(CC(C32)OCC4O)C)C)O)C | AL |
| 102 | Linoleic Acid | CCCCCC=CCC=CCCCCCCCC(=O)O | TN, TP |
| 103 | Lintetralin | COCC1CC2=CC(=C(C=C2C(C1COC)C3=CC4=C(C=C3)OCO4)OC)OC | PU |
| 104 | lupeol acetate | CC(=C)C1CCC2(C1C3CCC4C5(CCC(C(C5CCC4(C3(CC2)C)C)(C)C)OC(=O)C)C)C | PU |
| 105 | Luteolin | C1=CC(=C(C=C1C2=CC(=O)C3=C(C=C(C=C3O2)O)O)O)O | AL |
| 106 | Mallotinic Acid | C1C2C(C(C(C(O2)OC(=O)C3=CC(=C(C(=C3)O)O)O)O)OC(=O)C4=CC(=C(C(=C4C5=C(C(=C(C=C5C(=O)O1)O)O)O)O)O)OC6=C(C(=C(C=C6C(=O)O)O)O)O)O | PU |
| 107 | Mannitol | C(C(C(C(C(CO)O)O)O)O)O | AL |
| 108 | Metformin | CN(C)C(=N)N=C(N)N | PU |
| 109 | Methyl brevifolincarboxylate | COC(=O)C1CC(=O)C2=C1C3=C(C(=C(C=C3C(=O)O2)O)O)O | PU |
| 110 | methyl cucurbate | CCC=CCC1C(CCC1O)CC(=O)OC | PU |
| 111 | Methyl elaidate | CCCCCCCCC=CCCCCCCCC(=O)OC | TN |
| 112 | Methyl gallate | COC(=O)C1=CC(=C(C(=C1)O)O)O | AL, PU |
| 113 | Methyl palmitate | CCCCCCCCCCCCCCCC(=O)OC | TN |
| 114 | Methylene Chloride | C(Cl)Cl | PU |
| 115 | Myricetin | C1=C(C=C(C(=C1O)O)O)C2=C(C(=O)C3=C(C=C(C=C3O2)O)O)O | AL |
| 116 | Naringin | CC1C(C(C(C(O1)OC2C(C(C(OC2OC3=CC(=C4C(=O)CC(OC4=C3)C5=CC=C(C=C5)O)O)CO)O)O)O)O)O | PU |
| 117 | Nerifolin | CC1C(C(C(C(O1)OC2CCC3(C(C2)CCC4C3CCC5(C4(CCC5C6=CC(=O)OC6)O)C)C)O)OC)O | TN |
| 118 | Neriifolin | CC1C(C(C(C(O1)OC2CCC3(C(C2)CCC4C3CCC5(C4(CCC5C6=CC(=O)OC6)O)C)C)O)OC)O | TN |
| 119 | Neriifoside | CC1C(C(C(C(O1)OC2CCC3(C(C2)CCC4C3CCC5(C4(CCC5C6=CC(=O)OC6)O)C)C)O)OC)O | TN |
| 120 | Nerolidol | CC(=CCCC(=CCCC(C)(C=C)O)C)C | TN |
| 121 | Niranthin | COCC(CC1=CC(=C(C=C1)OC)OC)C(CC2=CC3=C(C(=C2)OC)OCO3)COC | PU |
| 122 | Nirtetralin | COCC1CC2=CC3=C(C(=C2C(C1COC)C4=CC(=C(C=C4)OC)OC)OC)OCO3 | PU |
| 123 | Octacosane | CCCCCCCCCCCCCCCCCCCCCCCCCCCC | AL |
| 124 | Octacosanol | CCCCCCCCCCCCCCCCCCCCCCCCCCCCO | AL |
| 125 | oleanolic acid | CC1(CCC2(CCC3(C(=CCC4C3(CCC5C4(CCC(C5(C)C)O)C)C)C2C1)C)C(=O)O)C | PU |
| 126 | Oleic acid | CCCCCCCCC=CCCCCCCCC(=O)O | TN |
| 127 | O-methylpongamol | COC1=C(C=CC2=C1C=CO2)C(=O)C=C(C3=CC=CC=C3)OC | TP |
| 128 | Osyritin | CC1C(C(C(C(O1)OCC2C(C(C(C(O2)OC3=C(OC4=CC(=CC(=C4C3=O)O)O)C5=CC(=C(C=C5)O)O)O)O)O)O)O)O | TP |
| 129 | Paclitaxel | CC1=C2C(C(=O)C3(C(CC4C(C3C(C(C2(C)C)(CC1OC(=O)C(C(C5=CC=CC=C5)NC(=O)C6=CC=CC=C6)O)O)OC(=O)C7=CC=CC=C7)(CO4)OC(=O)C)O)C)OC(=O)C | PU |
| 130 | Palmitic acid | CCCCCCCCCCCCCCCC(=O)O | TN |
| 131 | Para hydroxyl benzoic acid | C1=CC(=CC=C1C(=O)O)O | AL |
| 132 | Peruvianoside III | CC1C(C(C(C(O1)OCC2C(C(C(C(O2)OC3=C(OC4=CC(=CC(=C4C3=O)O)O)C5=CC(=C(C=C5)O)O)OC6C(C(C(C(O6)CO)O)O)O)O)O)O)O)O | TN |
| 133 | Peruvoside | CC1C(C(C(C(O1)OC2CCC3(C(C2)CCC4C3CCC5(C4(CCC5C6=CC(=O)OC6)O)C)C=O)O)OC)O | TN |
| 134 | Phenethylamine | C1=CC=C(C=C1)CCN | PU |
| 135 | P-hydroxybenzaldehyde | C1=CC(=CC=C1C=O)O | PU |
| 136 | Phyllanthin | COCC(CC1=CC(=C(C=C1)OC)OC)C(CC2=CC(=C(C=C2)OC)OC)COC | PU |
| 137 | Phyllanthusiin F | C1C(C2(C3C1(C(=O)OC4C(C(C(OC4OC(=O)C5=CC(=C(C(=C5)O)O)O)CO)OC(=O)C6=CC(=C(C(=C36)O2)O)O)O)O)O)O | PU |
| 138 | Phyllanthusiin U | C1C2C3C(C(C(O2)OC(=O)C4=CC(=C(C(=C4)O)O)O)OC(=O)C5=CC(=C(C6=C5C(C(C(=O)O3)CC(=O)O)C(=O)O6)O)O)OC(=O)C7=CC(=C(C(=C7C8=C(C(=C(C=C8C(=O)O1)O)O)O)O)O)O | PU |
| 139 | Phyllester | CC1=[N+](C2=CC=CC=C2C(=C1)N)CCCCCCCCCC[N+]3=C(C=C(C4=CC=CC=C43)N)C | PU |
| 140 | Phyltetralin | C1CC(C2=CC=CC=C2C1)C3=CC=CC=C3 | PU |
| 141 | Pongaglabol | C1=CC=C(C=C1)C2=CC(=O)C3=C(O2)C4=C(C=C3O)OC=C4 | TP |
| 142 | Pongamol | COC1=C(C=CC2=C1C=CO2)C(=O)CC(=O)C3=CC=CC=C3 | TP |
| 143 | Protocatechuic acid | COC1=C(C=CC(=C1)C(=O)O)O | PU |
| 144 | Pulegone | CC1CCC(=C(C)C)C(=O)C1 | TN |
| 145 | Purpureamethide |  | TP |
| 146 | Purpurin | C1=CC=C2C(=C1)C(=O)C3=C(C2=O)C(=C(C=C3O)O)O | TP |
| 147 | Purpuritenin |  | TP |
| 148 | Purpuritenin | CC1=CC=C(C=C1)C=CC(=O)C2=C(C3=C(C=C2)OC=C3)OC | TP |
| 149 | Pyrogallol | C1=CC(=C(C(=C1)O)O)O | PU |
| 150 | Quercetin | C1=CC(=C(C=C1C2=C(C(=O)C3=C(C=C(C=C3O2)O)O)O)O)O | AL, PU, SS, TP, TN |
| 151 | Quercetin 3-O-alpha-L-rhamnopyranoside | CC1C(C(C(C(O1)OC2=C(OC3=CC(=CC(=C3C2=O)O)O)C4=CC(=C(C=C4)O)O)O)O)O | PU |
| 152 | Quercetin-3- glucoside | CC1C(C(C(C(O1)OC2=CC(=C3C(=C2)OC(=C(C3=O)OC4C(C(C(C(O4)CO)O)O)O)C5=CC(=C(C=C5)O)O)O)O)O)O | AL |
| 153 | Quercetrin | CC1C(C(C(C(O1)OC2=C(OC3=CC(=CC(=C3C2=O)O)O)C4=CC(=C(C=C4)O)O)O)O)O | AL |
| 154 | Repandinin B | CCC(C)C(=O)OC1C2C(C(C(=C)CCC=C(C1OC(=O)C(=CC)CO)C(=O)OC)O)OC(=O)C2=C | PU |
| 155 | Repandusinic Acid A | C1C2C(C(C(C(O2)OC(=O)C3=CC(=C(C(=C3)O)O)O)O)OC(=O)C4=CC(=C(C(=C4C5=C(C(=C(C=C5C(=O)O1)O)O)O)O)O)O)OC(=O)C(=CC(=O)O)C6C(OC(=O)C7=CC(=C(C(=C67)O)O)O)C(=O)O | PU |
| 156 | Rhamnocitrin | COC1=CC(=C2C(=C1)OC(=C(C2=O)O)C3=CC=C(C=C3)O)O | PU |
| 157 | Rotenone | CC(=C)C1CC2=C(O1)C=CC3=C2OC4COC5=CC(=C(C=C5C4C3=O)OC)OC | TP |
| 158 | Rutin | CC1C(C(C(C(O1)OCC2C(C(C(C(O2)OC3=C(OC4=CC(=CC(=C4C3=O)O)O)C5=CC(=C(C=C5)O)O)O)O)O)O)O)O | AL, PU, TN |
| 159 | Ruvoside | CC1C(C(C(C(O1)OC2CCC3(C(C2)CCC4C3CCC5(C4(CCC5C6=CC(=O)OC6)O)C)CO)O)OC)O | TN |
| 160 | Secoisolariciresinol diglucoside | COC1=C(C=CC(=C1)CC(COC2C(C(C(C(O2)CO)O)O)O)C(CC3=CC(=C(C=C3)O)OC)COC4C(C(C(C(O4)CO)O)O)O)O | SS |
| 161 | Semiglabrin | CC(=O)OC1C2C(OC3=C2C4=C(C=C3)C(=O)C=C(O4)C5=CC=CC=C5)OC1(C)C | TP |
| 162 | Solamargine | CC1CCC2(C(C3C(O2)CC4C3(CCC5C4CC=C6C5(CCC(C6)OC7C(C(C(C(O7)CO)OC8C(C(C(C(O8)C)O)O)O)O)OC9C(C(C(C(O9)C)O)O)O)C)C)C)NC1 | SS |
| 163 | Solanine | CC1CCC2C(C3C(N2C1)CC4C3(CCC5C4CC=C6C5(CCC(C6)OC7C(C(C(C(O7)CO)O)OC8C(C(C(C(O8)CO)O)O)O)OC9C(C(C(C(O9)C)O)O)O)C)C)C | SS |
| 164 | Solanoside | CC1C(C(C(C(O1)OC2CCC3(C(C2)CCC4C3CCC5(C4(CCC5C6=CC(=O)OC6)O)C)C)O)OC)O | TN |
| 165 | Solasodine | CC1CCC2(C(C3C(O2)CC4C3(CCC5C4CC=C6C5(CCC(C6)O)C)C)C)NC1 | SS |
| 166 | Spathulenol | CC1(C2C1C3C(CCC3(C)O)C(=C)CC2)C | TN |
| 167 | Spinosterol | [C@]12([C@H](C[C@H](CC1)O)CC=C1[C@@H]2CC[C@]2([C@H]1CC[C@@H]2[C@@H](/C=C/C(CC)C(C)C)C)C)C | TP |
| 168 | Spruceanol | CC1=C(C=C2C(=C1C=C)CCC3C2(CCC(C3(C)C)O)C)O | PU |
| 169 | Syringin | COC1=CC(=CC(=C1OC2C(C(C(C(O2)CO)O)O)O)OC)C=CCO | PU |
| 170 | tephropurpulin A | CC(=O)OC(C1COC2=C1C3=C(CC=C(O3)C4=CC=CC=C4)C(=C2)O)C(C)(C)O | TP |
| 171 | Tephrosin | CC1(C=CC2=C(O1)C=CC3=C2OC4COC5=CC(=C(C=C5C4(C3=O)O)OC)OC)C | TP |
| 172 | Tetradecanoic acid | CCCCCCCCCCCCCC(=O)O | TP |
| 173 | Tetrahydrogeraniol | CC(C)CCCC(C)CCO | TN |
| 174 | Tetratriacontane | CCCCCCCCCCCCCCCCCCCCCCCCCCCCCCCCCC | TP |
| 175 | Thevefolic acid | C1=CC(=C(C=C1C(=O)O)O)CC(C(=O)O)O | TN |
| 176 | Thevefolic acid A | COC(=O)C(CC1=C(C=C(C=C1)C(=O)O)O)O | TN |
| 177 | Thevefolin | CC1C(C(C(C(O1)OC2CCC3(C(C2)CCC4C3CCC5(C4(CCC5C6=CC(=O)OC6)O)C)C)O)OC)O | TN |
| 178 | Thevefolin | CC1C(C(C(C(O1)OC2CCC3(C(C2)CCC4C3CCC5(C4(CCC5C6=CC(=O)OC6)O)C)C)O)OC)O | TN |
| 179 | Theveside | C1C=C(C2C1(C(=COC2OC3C(C(C(C(O3)CO)O)O)O)C(=O)O)O)CO | TN |
| 180 | Theveside Me ester | COC(=O)C1=COC(C2C1(CC=C2CO)O)OC3C(C(C(C(O3)CO)O)O)O | TN |
| 181 | Thevetiaflavone | COC1=CC(=CC2=C1C(=O)C=C(O2)C3=CC=C(C=C3)O)O | TN |
| 182 | Thevetin | CC1C(C(C(C(O1)OC2CCC3(C(C2)CCC4C3CCC5(C4(CCC5C6=CC(=O)OC6)O)C)C)O)OC)OC7C(C(C(C(O7)COC8C(C(C(C(O8)CO)O)O)O)O)O)O | TN |
| 183 | Thevetin A | CC1C(C(C(C(O1)OC2CCC3(C(C2)CCC4C3CCC5(C4(CCC5C6=CC(=O)OC6)O)C)C=O)O)OC)OC7C(C(C(C(O7)COC8C(C(C(C(O8)CO)O)O)O)O)O)O | TN |
| 184 | Thevetin B | CC1C(C(C(C(O1)OC2CCC3(C(C2)CCC4C3CCC5(C4(CCC5C6=CC(=O)OC6)O)C)C)O)OC)OC7C(C(C(C(O7)COC8C(C(C(C(O8)CO)O)O)O)O)O)O | TN |
| 185 | Thevetioside A | CC1C(C(C(C(O1)OC2CCC3(C(C2)CCC4C3CC5(C4(CCC(C5=C)C6=CC(=O)OC6)O)C)C)O)OC)O | TN |
| 186 | Thevetioside B | CC1C(C(C(C(O1)OC2CCC3(C(C2)CCC4C3CC5(C4(CCC(C5=C)C6=CC(=O)OC6)O)C)C)O)OC)O | TN |
| 187 | Thevetioside C | CC1C(C(C(C(O1)OC2CCC3(C(C2)CCC4C3CC5(C4(CCC(C5=C)C6=CC(=O)OC6)O)C)C)O)OC)OC7C(C(C(C(O7)CO)O)O)O | TN |
| 188 | Thevetioside E | CC1C(C(C(C(O1)OC2CCC3(C(C2)CCC4C3CC5(C4(CCC(C5=C)C6=CC(=O)OC6)O)C)C)OC(=O)C)OC)OC7C(C(C(C(O7)CO)O)O)O | TN |
| 189 | Thevetioside F | CC1C(C(C(C(O1)OC2CCC3(C(C2)CCC4C3CC5(C4(CCC(C5=C)C6=CC(=O)OC6)O)C)C)O)OC)OC7C(C(C(C(O7)COC8C(C(C(C(O8)CO)O)O)O)O)O)O | TN |
| 190 | Thevetioside H | CC1C(C(C(C(O1)OC2CCC3(C(C2)CCC4C3CC5(C4(CCC(C5=C)C6=CC(=O)OC6)O)C)C)O)OC)OC7C(C(C(C(O7)COC8C(C(C(C(O8)CO)O)O)O)O)O)O | TN |
| 191 | Theviridoside | COC(=O)C1=COC(C2C1(CC=C2CO)O)OC3C(C(C(C(O3)CO)O)O)O | TN |
| 192 | Triacontane | CCCCCCCCCCCCCCCCCCCCCCCCCCCCCC | AL |
| 193 | Triacontanol | CCCCCCCCCCCCCCCCCCCCCCCCCCCCCCO | AL |
| 194 | Triacontanol | CCCCCCCCCCCCCCCCCCCCCCCCCCCCCCO | PU |
| 195 | Trihydroxycard-20(22)- | CC12CCC(CC1CCC3C2CC(C4(C3(CCC4C5=CC(=O)OC5)O)C)O)O | TN |
| 196 | Trimethylamine Hydrochloride | CN(C)C | PU |
| 197 | Triterpenoid | CC1(CCC2(CCC3(C(=CCC4C3(CCC5C4(CCC(C5(C)COS(=O)(=O)O)O)C)C)C2C1)C)C(=O)O)C | TP |
| 198 | Urinaligran | COCC1C(C(OC1C2=CC3=C(C=C2)OCO3)C4=CC5=C(C=C4)OCO5)COC | PU |
| 199 | Urinatetralin | COCC1CC2=CC3=C(C=C2C(C1COC)C4=CC5=C(C=C4)OCO5)OCO3 | PU |
| 200 | ursolic acid | CC1CCC2(CCC3(C(=CCC4C3(CCC5C4(CCC(C5(C)C)O)C)C)C2C1C)C)C(=O)O | TP |
| 201 | Virgatusin | COCC1C(C(OC1C2=CC3=C(C=C2)OCO3)C4=CC(=C(C=C4)OC)OC)COC | PU |
| 202 | β-Amyrin | CC1(CCC2(CCC3(C(=CCC4C3(CCC5C4(CCC(C5(C)C)O)C)C)C2C1)C)C)C | AL, PU |
| 203 | β-betulinic acid | CC(=C)C1CCC2(C1C3CCC4C5(CCC(C(C5CCC4(C3(CC2)C)C)(C)C)O)C)C(=O)O | PU |
| 204 | β-Caryophyllene oxide | CC1(CC2C1CCC3(C(O3)CCC2=C)C)C | TP |
| 205 | β-sitosterol-3-O-β-d-glucopyranoside | CCC(CCC(C)C1CCC2C1(CCC3C2CC=C4C3(CCC(C4)OC5C(C(C(C(O5)CO)O)O)O)C)C)C(C)C | PU |
| 206 | Avibactam | C1CC(N2CC1N(C2=O)OS(=O)(=O)O)C(=O)N | Standard Drug |


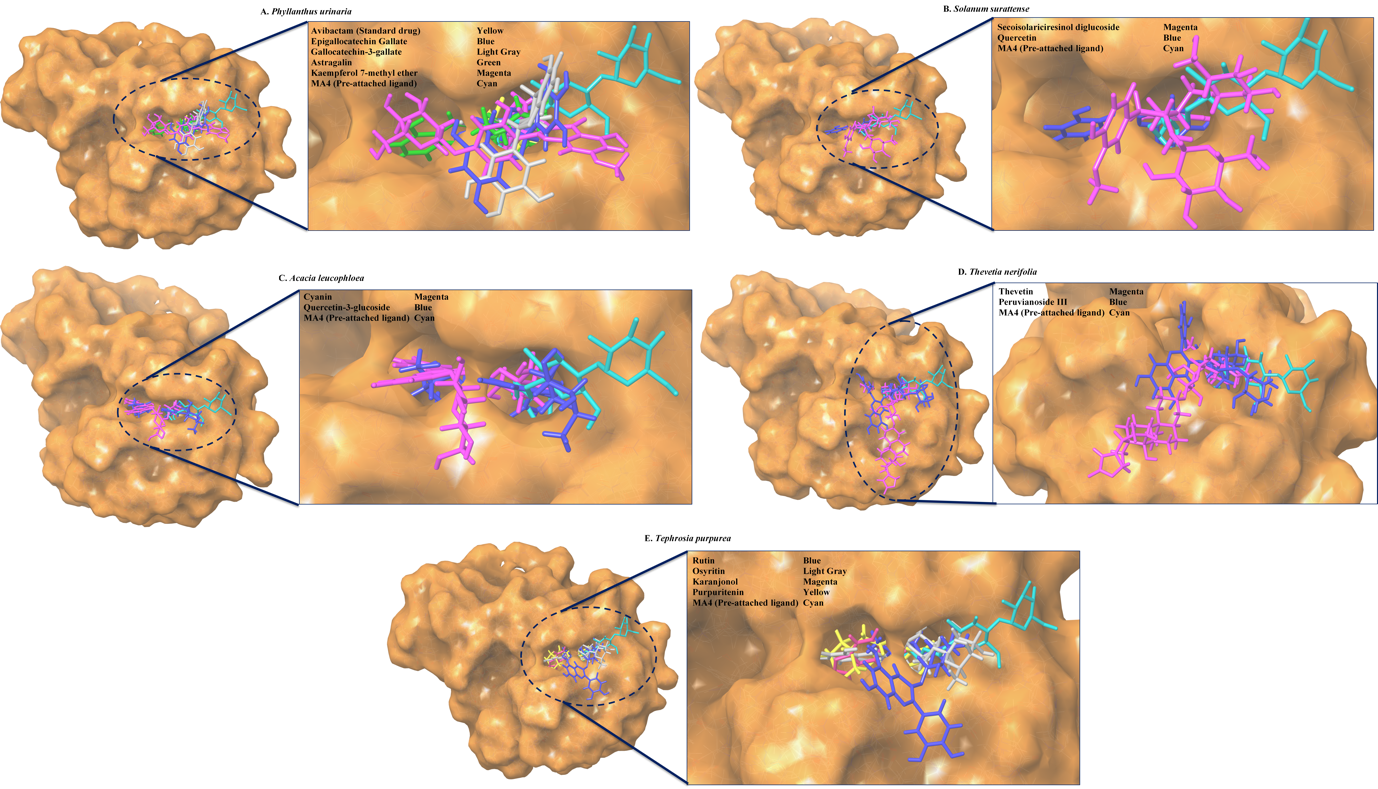


**Figure S1.** Binding mode in 3D-oriention of phytochemicals and MA4


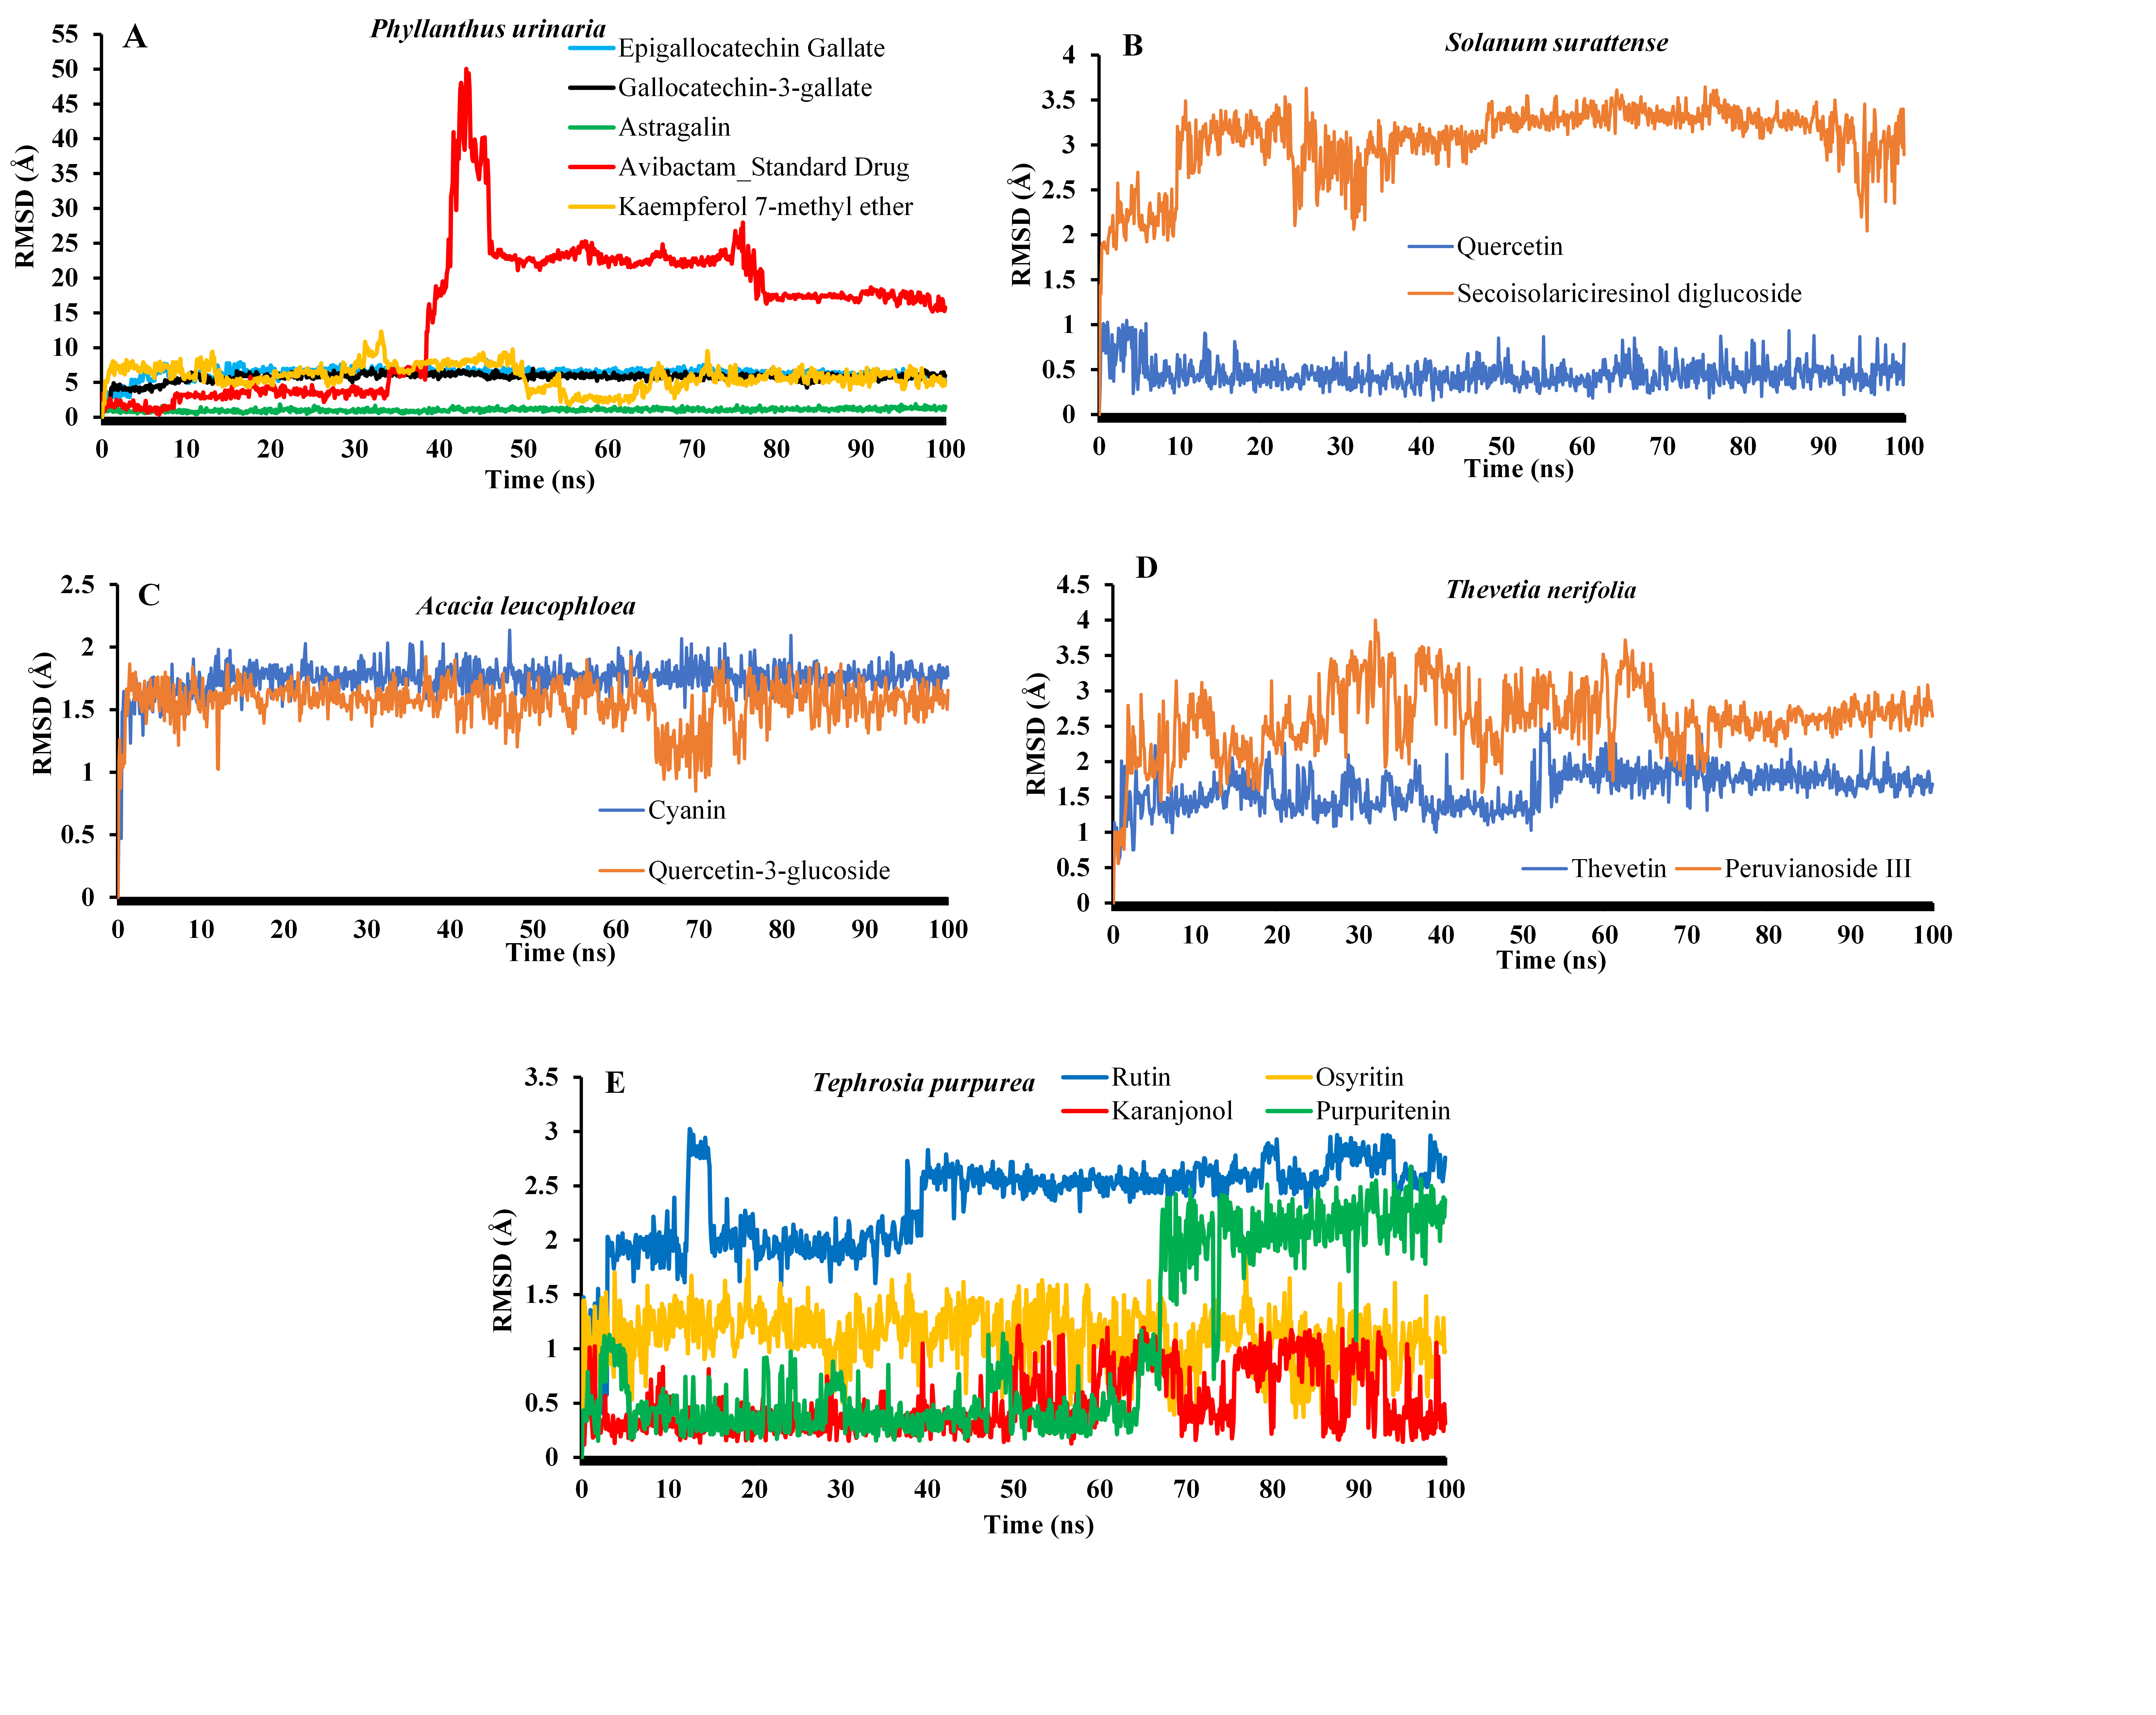


**Figure S2.** RMSD vs time of MD simulation of phytochemicals and Avibactam


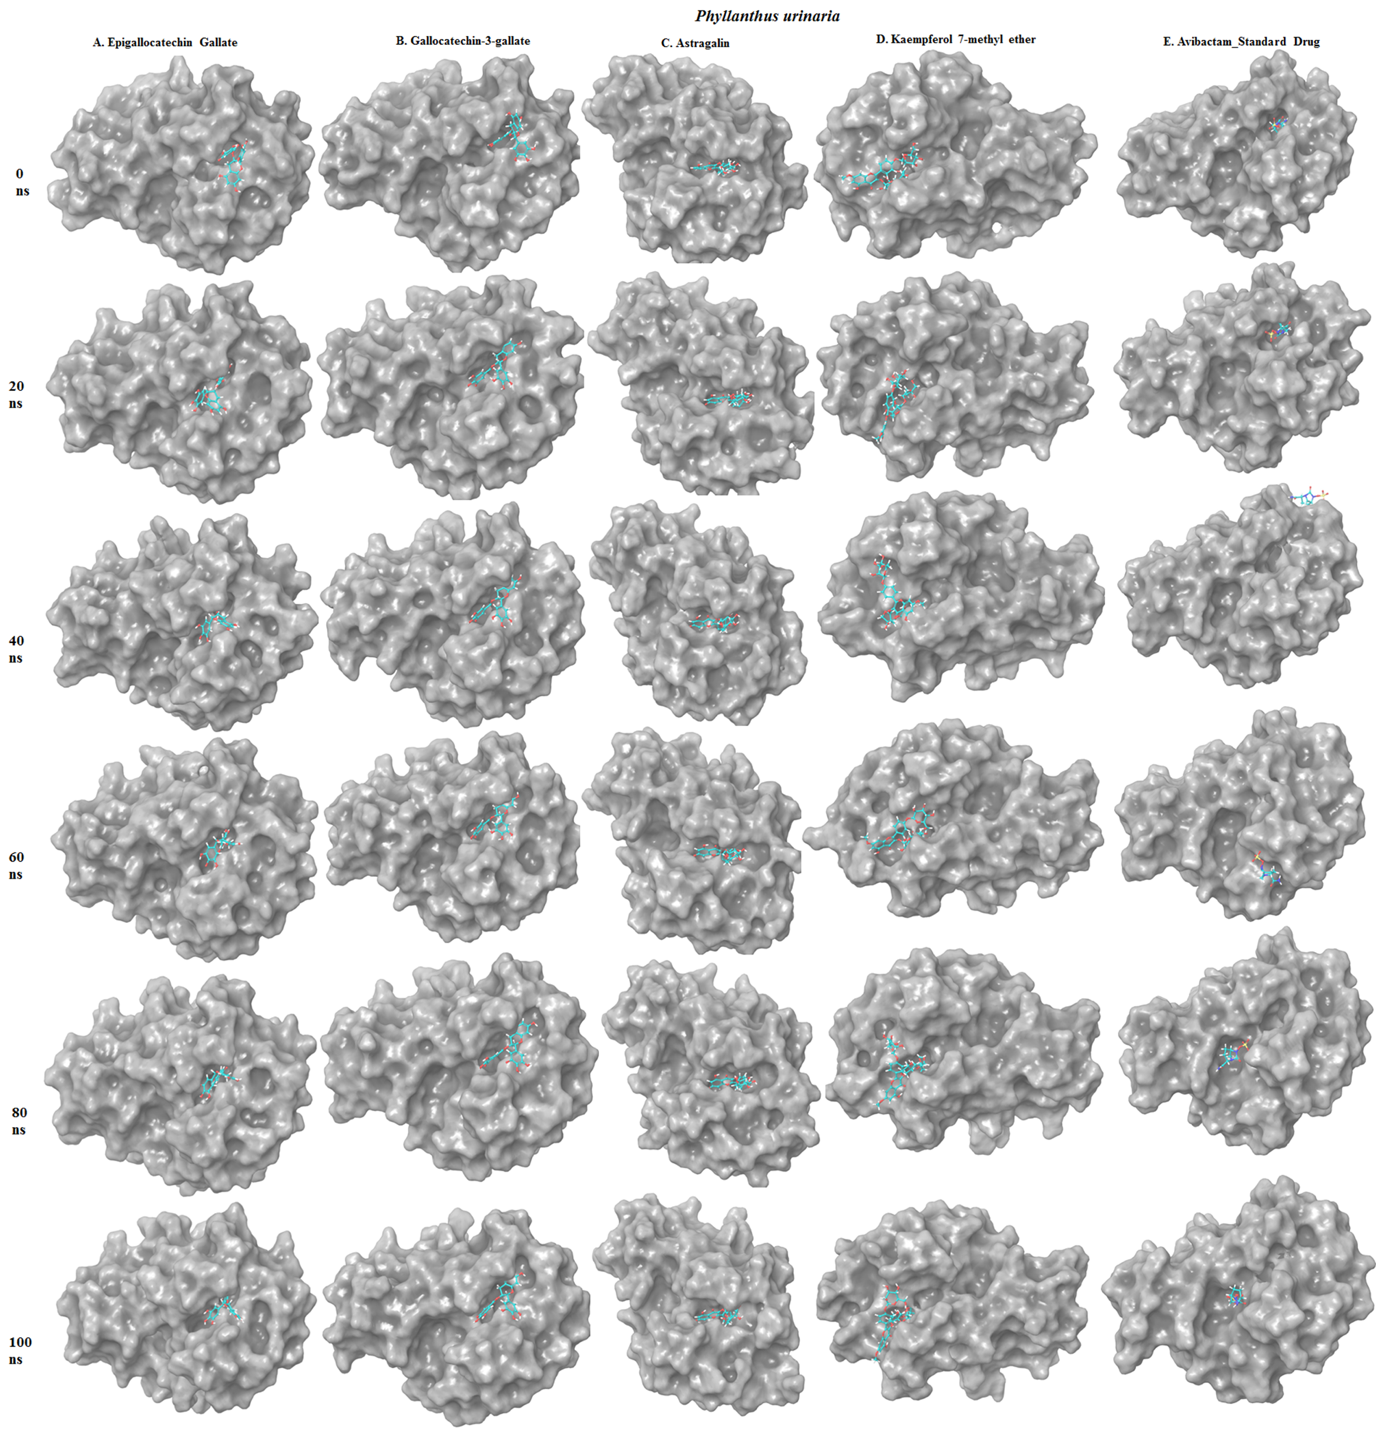


**Figure S3.** Orientation of phytochemicals (belong to *Phyllanthus urinaria*) complex with β-lactamase in different MD simulation trajectories


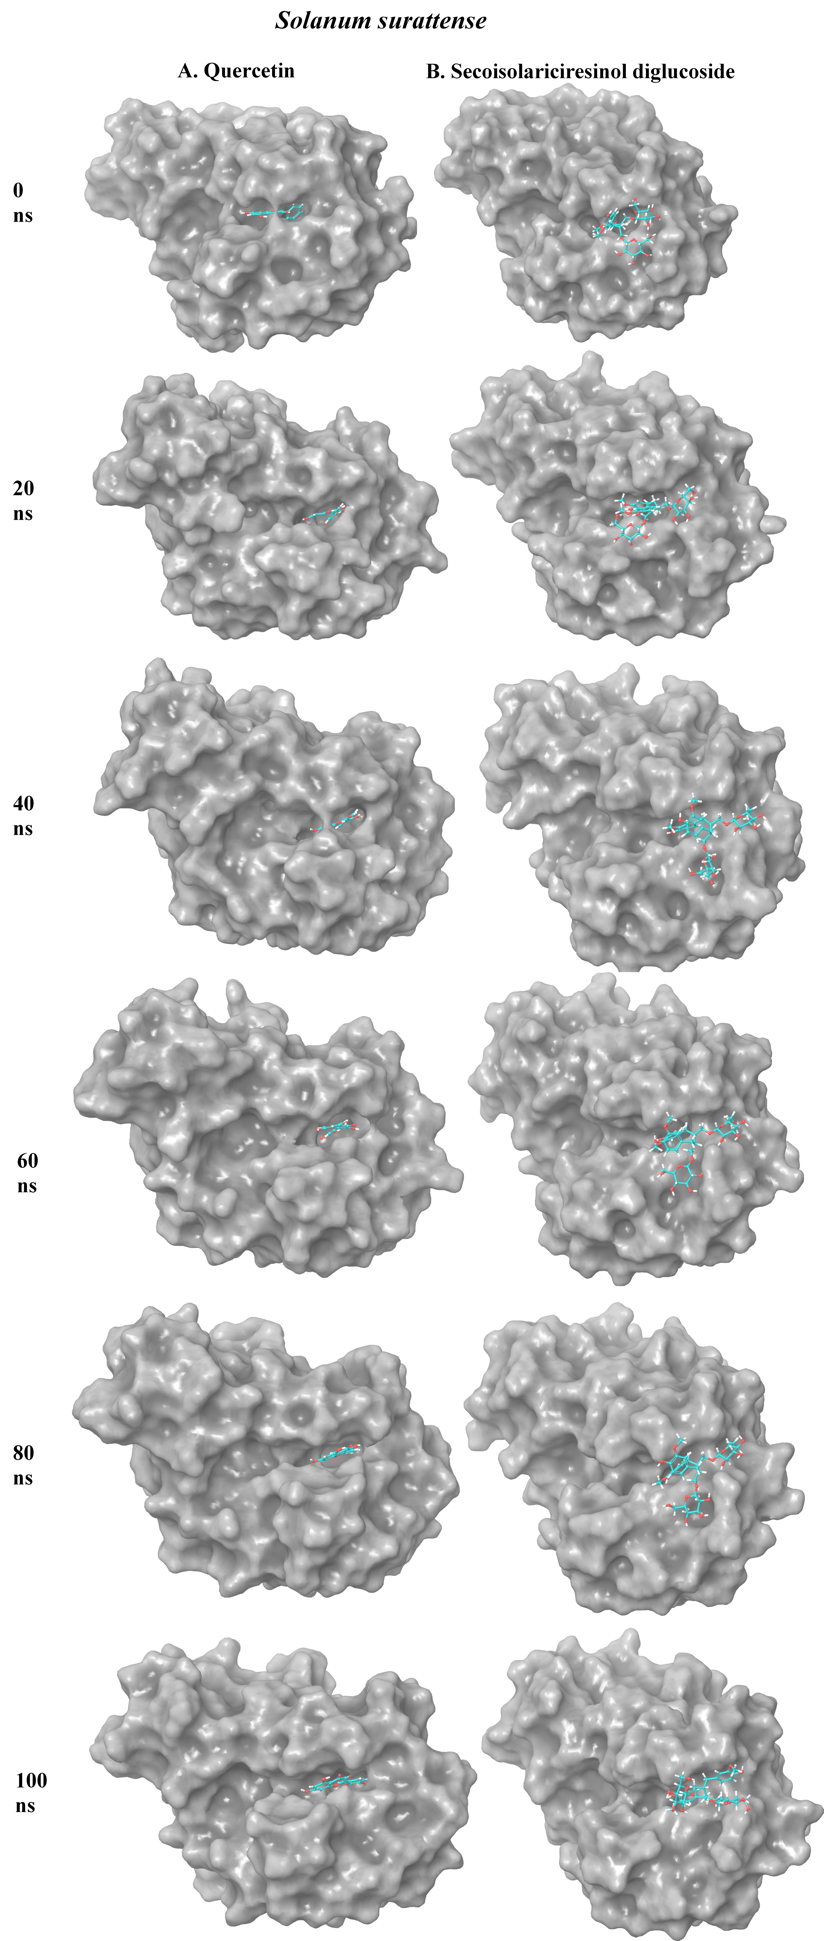


**Figure S4.** Orientation of phytochemicals (belong to *Solanum surattense*) complex with β-lactamase in different MD simulation trajectories

*
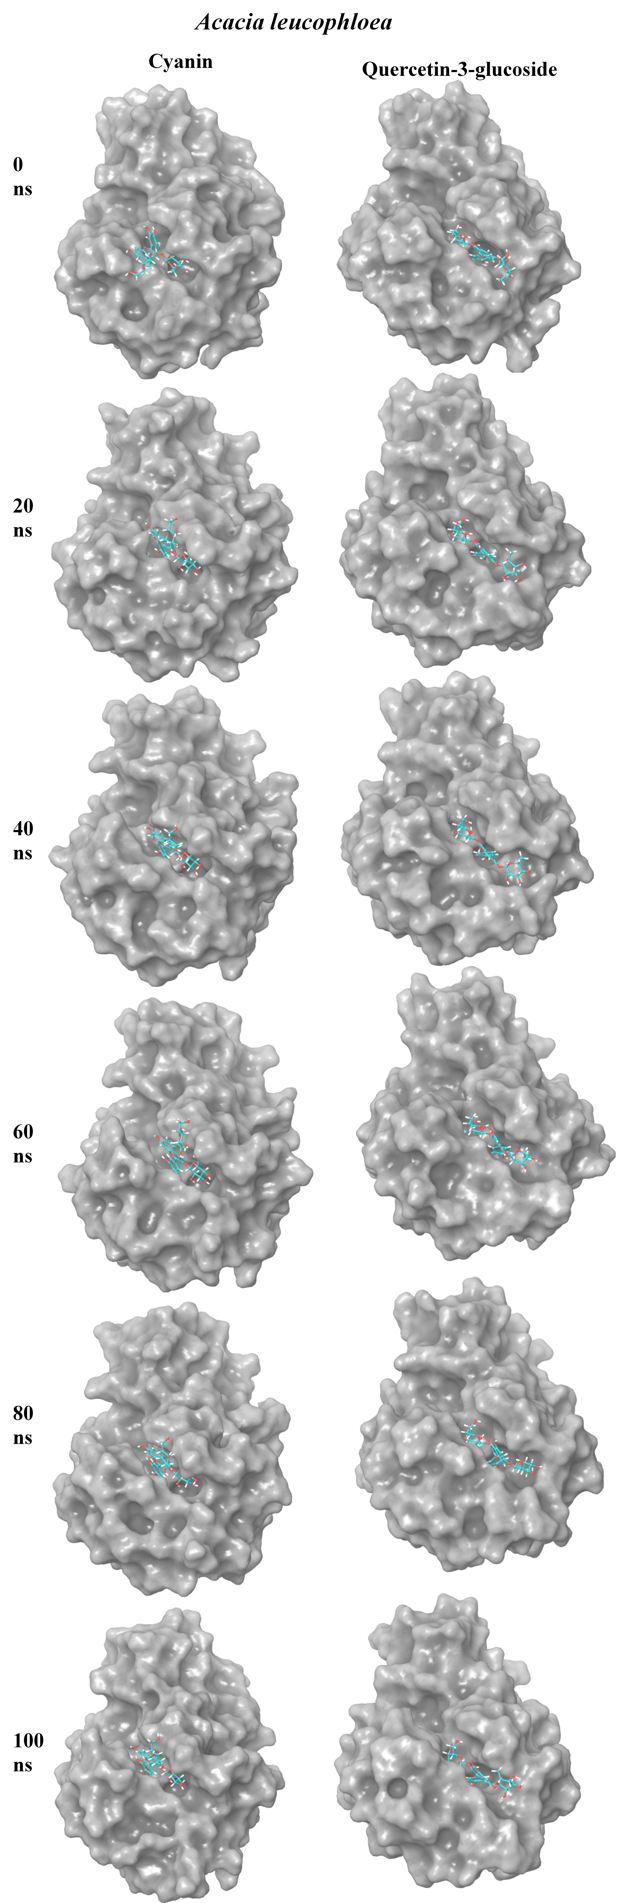
*

**Figure S5.** Orientation of phytochemicals (belong to *Acacia leucophloea*) complex with β-lactamase in different MD simulation trajectories

*
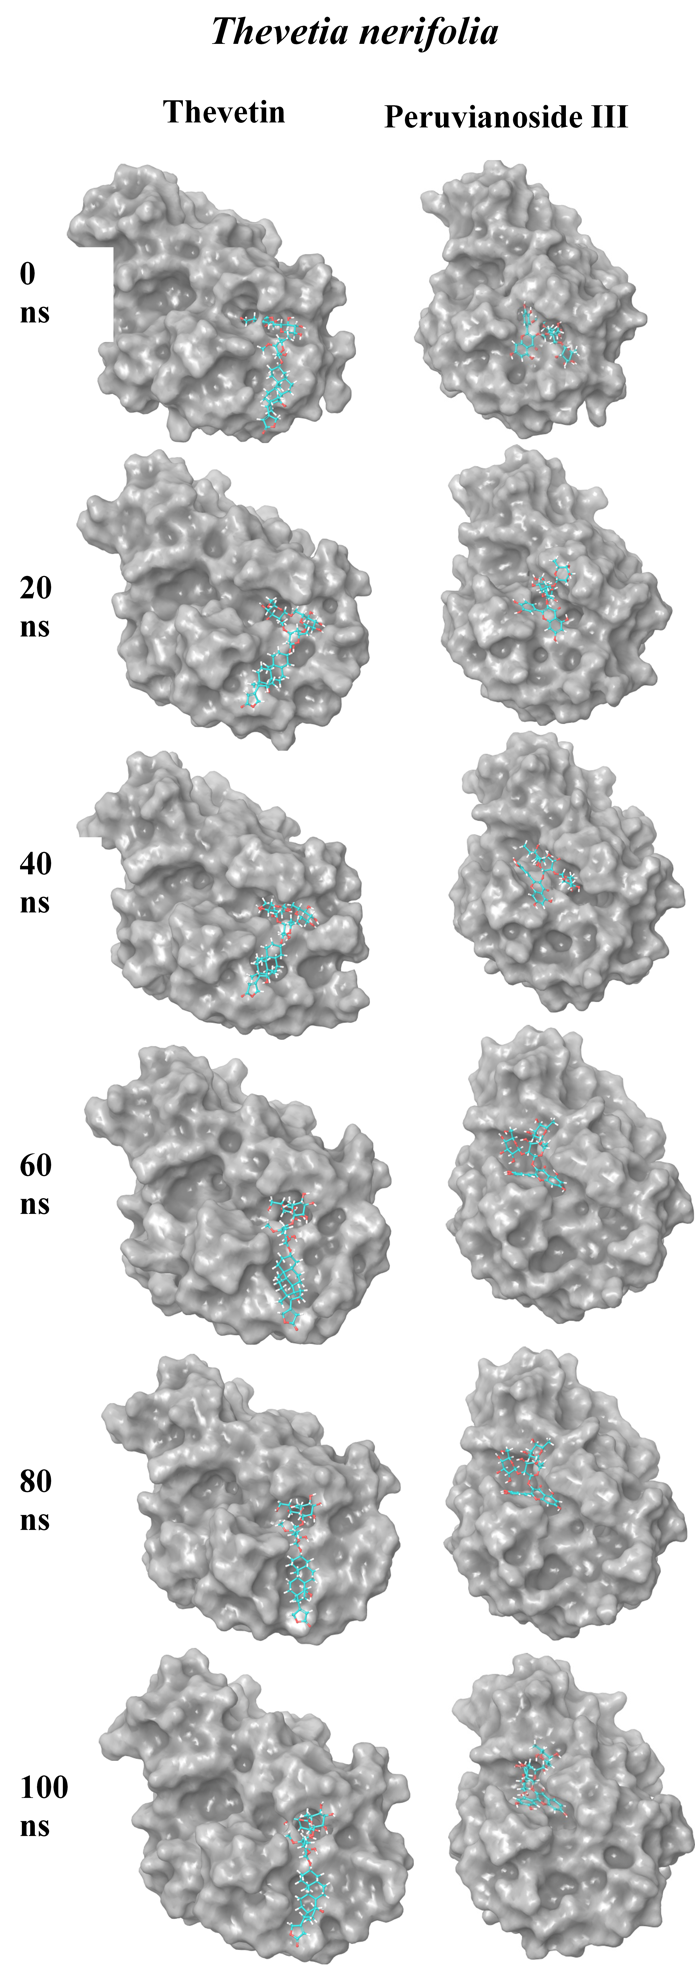
*

**Figure S6.** Orientation of phytochemicals (belong to *Thevetia nerifolia*) complex with β-lactamase in different MD simulation trajectories


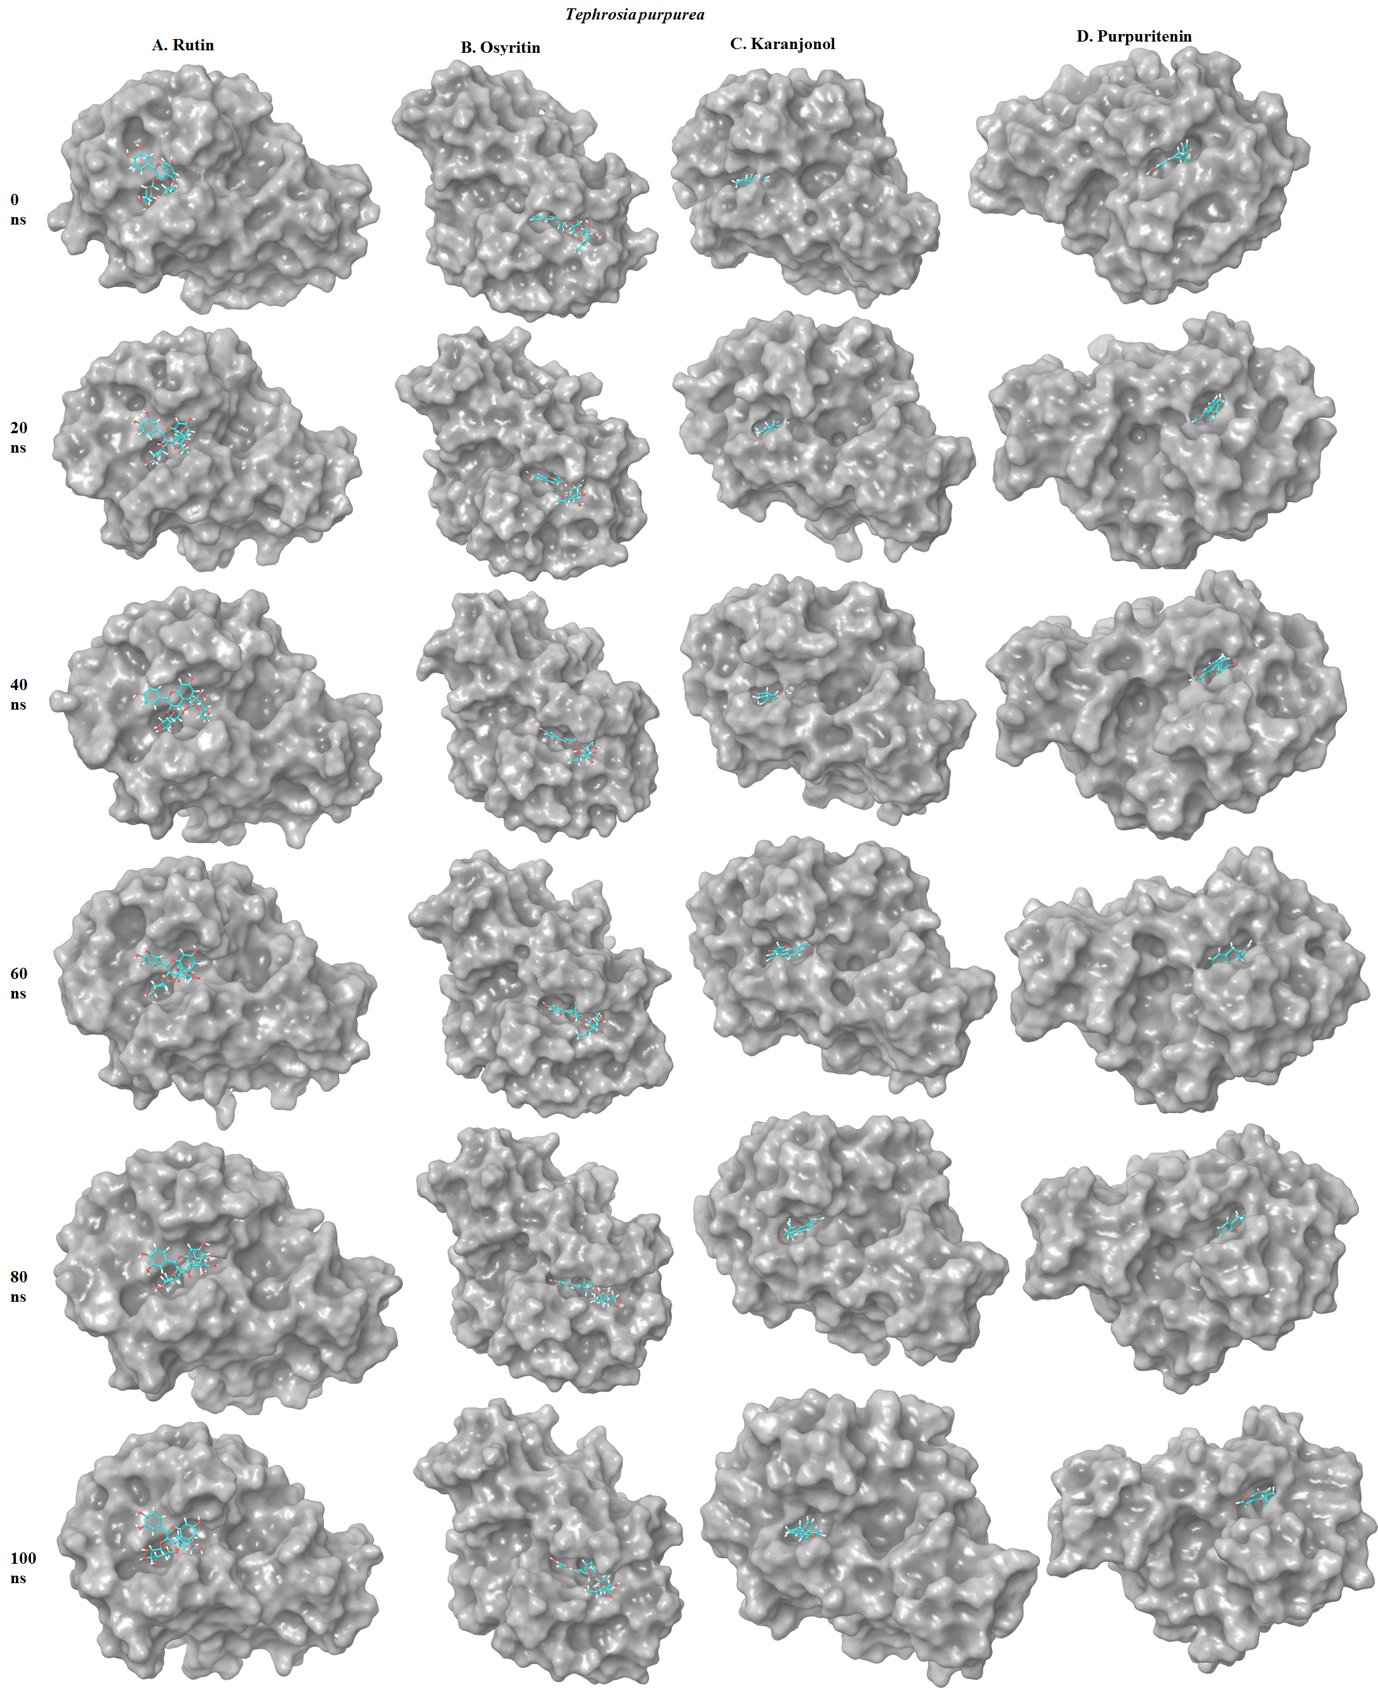


**Figure S7.** Orientation of phytochemicals (belong to *Tephrosia purpurea*) complex with β-lactamase in different MD simulation trajectories
